# Supplementary material for: Vaginal microbial dynamics and pathogen colonization in a humanized microbiota mouse model
Source: PubMed Central journal article supplement (PMC10661851; doi:10.1038/s41522-023-00454-9), 2023-11-20
Supplement: 41522_2023_454_MOESM1_ESM.pdf [file 41522_2023_454_MOESM1_ESM.pdf]

## **SUPPLEMENTAL MATERIALS**

### **Vaginal microbial dynamics and pathogen colonization in a humanized microbiota mouse model**

Marlyd E. Mejia, Vicki Mercado-Evans, Jacob J. Zulk, Samantha Ottinger, Korinna Ruiz, Mallory B. Ballard, Stephanie W. Fowler, Robert A. Britton, and Kathryn A. Patras

#### **Contents:**

Supplementary Figures 1-7

Supplementary Tables 1-2

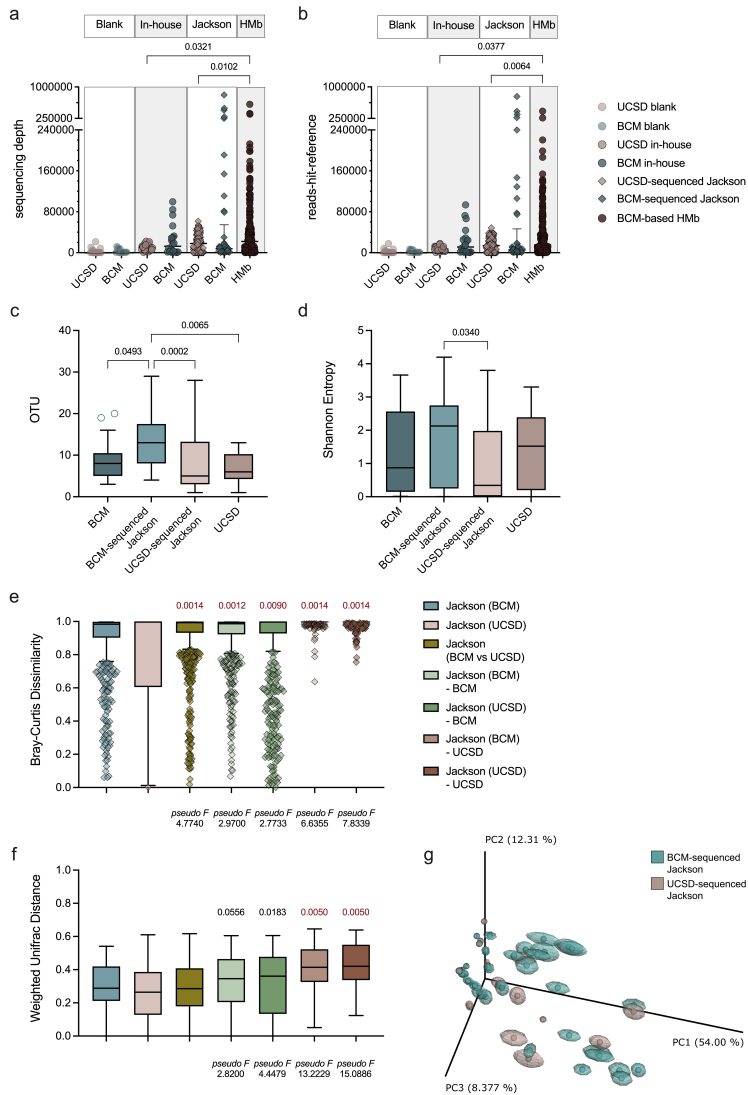

**Supplementary Figure 1. Vaginal microbiome data disaggregated by sequencing site.** Sequencing output data from vaginal swabs processed in separate sequencing pipelines were compared. **(a)** Read depth and **(b)** reads matched post deblur to the internal Qiime2 reference database for each mouse colony sequenced at BCM or UCSD. Blanks are included per sequencing site (not included in statistical analysis). **(c)** Observed OTUs and **(d)** Shannon entropy of vaginal swab samples. Colony instability and inter-site variation by **(e)** Bray-Curtis or **(f)** weighted normalized UniFrac distances in comparison to either Jackson mice sequenced at BCM or UCSD. **(g)** PCoA of vaginal communities clustered by weighted normalized UniFrac distances between Jackson colonies. Centroids were determined by jackknifed rarefaction (100 reads). Each symbol (a-b, g) represents a unique vaginal swab community/sample with median and interquartile ranges (a-b). Tukey's boxplots are displayed (c-f). Data were analyzed by Kruskal-Wallis with a Dunn's multiple comparison test excluding blanks (a-d) or PERMANOVA followed by PERMDISP (e-f). PERMANOVA  $P$  values ( $P < 0.1$ ) are colored in red if PERMDISP was also statistically significant ( $<0.05$ ). All other statistically significant  $P$  values are reported. Adjusted  $P$  values  $< 0.1$  are reported for e-f.

| OTUs Present in Murine Vaginal Samples (n = 2267)                                                                                                                                                                                                                                                                                                                                                                                                                                                                                                                                                                                                                                                                                                                                                                                                                                                                                                                                                                                                                                                                                                                                                                                                                                                                                                                                                                                                                                                                                                                                                                                                                                                                                                                                                                                                                           |                                                                                                                                                                                                                                                                                                                                                                                                                                                                                                                                                                                                                                                                                                                                                                                                                                                                                                                                                                                                                                                                                                                                                                                                                                                                                                                                                                                                                                                                                                                                                                                                                                                                                                                                                                                                                                                                                                        |                                                                                                                                                                                                                                                                                                                                                                                                                                                                                                                                                                                                                                                                                                                                                                                                                                                                                                                                                                                                                                                                                                                                                                                                                                                                                                                                                                                                                                                                                                                                                                                                                                                                                                                                                                                                                |                                                                                                                                                                                                                                                                                                                                                                                                                                                                                                                                                                                                                                                                                                                                                                                                                                                                                                                                                                                                                                                                                                                                                                                                                                                                                                                                                                                                                                                                                                                                                                                                                                                                                                                                                                                                                                                                                                           |                                                                                                                                                                                                                                                                                                                                                                                                                                                                                                                                                                                                                                                                                                                                                                                                                                                                                                                                                                                                                                                                                                                                                                                                                                                                                                                                   |                                                                                                                                                                                                                                                                                                                                                                                                                                                                                                                                                                                                                                                                                                                                                                                                                                                                                                                                                                                                                                                                |                                                                                                                 |
|-----------------------------------------------------------------------------------------------------------------------------------------------------------------------------------------------------------------------------------------------------------------------------------------------------------------------------------------------------------------------------------------------------------------------------------------------------------------------------------------------------------------------------------------------------------------------------------------------------------------------------------------------------------------------------------------------------------------------------------------------------------------------------------------------------------------------------------------------------------------------------------------------------------------------------------------------------------------------------------------------------------------------------------------------------------------------------------------------------------------------------------------------------------------------------------------------------------------------------------------------------------------------------------------------------------------------------------------------------------------------------------------------------------------------------------------------------------------------------------------------------------------------------------------------------------------------------------------------------------------------------------------------------------------------------------------------------------------------------------------------------------------------------------------------------------------------------------------------------------------------------|--------------------------------------------------------------------------------------------------------------------------------------------------------------------------------------------------------------------------------------------------------------------------------------------------------------------------------------------------------------------------------------------------------------------------------------------------------------------------------------------------------------------------------------------------------------------------------------------------------------------------------------------------------------------------------------------------------------------------------------------------------------------------------------------------------------------------------------------------------------------------------------------------------------------------------------------------------------------------------------------------------------------------------------------------------------------------------------------------------------------------------------------------------------------------------------------------------------------------------------------------------------------------------------------------------------------------------------------------------------------------------------------------------------------------------------------------------------------------------------------------------------------------------------------------------------------------------------------------------------------------------------------------------------------------------------------------------------------------------------------------------------------------------------------------------------------------------------------------------------------------------------------------------|----------------------------------------------------------------------------------------------------------------------------------------------------------------------------------------------------------------------------------------------------------------------------------------------------------------------------------------------------------------------------------------------------------------------------------------------------------------------------------------------------------------------------------------------------------------------------------------------------------------------------------------------------------------------------------------------------------------------------------------------------------------------------------------------------------------------------------------------------------------------------------------------------------------------------------------------------------------------------------------------------------------------------------------------------------------------------------------------------------------------------------------------------------------------------------------------------------------------------------------------------------------------------------------------------------------------------------------------------------------------------------------------------------------------------------------------------------------------------------------------------------------------------------------------------------------------------------------------------------------------------------------------------------------------------------------------------------------------------------------------------------------------------------------------------------------|-----------------------------------------------------------------------------------------------------------------------------------------------------------------------------------------------------------------------------------------------------------------------------------------------------------------------------------------------------------------------------------------------------------------------------------------------------------------------------------------------------------------------------------------------------------------------------------------------------------------------------------------------------------------------------------------------------------------------------------------------------------------------------------------------------------------------------------------------------------------------------------------------------------------------------------------------------------------------------------------------------------------------------------------------------------------------------------------------------------------------------------------------------------------------------------------------------------------------------------------------------------------------------------------------------------------------------------------------------------------------------------------------------------------------------------------------------------------------------------------------------------------------------------------------------------------------------------------------------------------------------------------------------------------------------------------------------------------------------------------------------------------------------------------------------------------------------------------------------------------------------------------------------------|-----------------------------------------------------------------------------------------------------------------------------------------------------------------------------------------------------------------------------------------------------------------------------------------------------------------------------------------------------------------------------------------------------------------------------------------------------------------------------------------------------------------------------------------------------------------------------------------------------------------------------------------------------------------------------------------------------------------------------------------------------------------------------------------------------------------------------------------------------------------------------------------------------------------------------------------------------------------------------------------------------------------------------------------------------------------------------------------------------------------------------------------------------------------------------------------------------------------------------------------------------------------------------------------------------------------------------------|----------------------------------------------------------------------------------------------------------------------------------------------------------------------------------------------------------------------------------------------------------------------------------------------------------------------------------------------------------------------------------------------------------------------------------------------------------------------------------------------------------------------------------------------------------------------------------------------------------------------------------------------------------------------------------------------------------------------------------------------------------------------------------------------------------------------------------------------------------------------------------------------------------------------------------------------------------------------------------------------------------------------------------------------------------------|-----------------------------------------------------------------------------------------------------------------|
| <p>Removal of OTUs Present in Less Than 5 Samples (n = 600)<br/>           Filtering of Table by samples-to-keep (n=435)</p>                                                                                                                                                                                                                                                                                                                                                                                                                                                                                                                                                                                                                                                                                                                                                                                                                                                                                                                                                                                                                                                                                                                                                                                                                                                                                                                                                                                                                                                                                                                                                                                                                                                                                                                                                |                                                                                                                                                                                                                                                                                                                                                                                                                                                                                                                                                                                                                                                                                                                                                                                                                                                                                                                                                                                                                                                                                                                                                                                                                                                                                                                                                                                                                                                                                                                                                                                                                                                                                                                                                                                                                                                                                                        |                                                                                                                                                                                                                                                                                                                                                                                                                                                                                                                                                                                                                                                                                                                                                                                                                                                                                                                                                                                                                                                                                                                                                                                                                                                                                                                                                                                                                                                                                                                                                                                                                                                                                                                                                                                                                |                                                                                                                                                                                                                                                                                                                                                                                                                                                                                                                                                                                                                                                                                                                                                                                                                                                                                                                                                                                                                                                                                                                                                                                                                                                                                                                                                                                                                                                                                                                                                                                                                                                                                                                                                                                                                                                                                                           |                                                                                                                                                                                                                                                                                                                                                                                                                                                                                                                                                                                                                                                                                                                                                                                                                                                                                                                                                                                                                                                                                                                                                                                                                                                                                                                                   |                                                                                                                                                                                                                                                                                                                                                                                                                                                                                                                                                                                                                                                                                                                                                                                                                                                                                                                                                                                                                                                                |                                                                                                                 |
| <p>o_Pedospherales<br/>           o_Staphylococcales<br/>           o_UBA566<br/>           f_17286-1<br/>           f_7-9<br/>           f_A4b<br/>           f_Adiltibacteriaceae<br/>           f_Acetobacteraceae<br/>           f_Acidaminococcaceae<br/>           f_Actinomycetaceae<br/>           f_Acutibacteriaceae<br/>           f_Aerococcaceae<br/>           f_Aeromonadaceae<br/>           f_Aestuariairivigaceae<br/>           f_Aifellaceae<br/>           f_Ahniellaceae<br/>           f_Akkermansiaceae<br/>           f_Alanivoracaceae<br/>           f_Alteromonadaceae<br/>           f_Aurantiobacillaceae<br/>           f_Anaerotrignaceae<br/>           f_Anaerovoracaceae<br/>           f_Anoxobacillaceae<br/>           f_Aquaspirillaceae<br/>           f_Arcobacteraceae<br/>           f_Arenimicrobiaceae<br/>           f_Atopobiaceae<br/>           f_Aurantimonadaceae<br/>           f_Azospirillaceae<br/>           f_B-17B0<br/>           f_Bacillaceae<br/>           f_Bacteroidaceae<br/>           f_Barnesiellaceae<br/>           f_Bdellovibrionaceae<br/>           f_Bejerinckiacae<br/>           f_Bautenbergiaceae<br/>           f_Bifidobacteriaceae<br/>           f_Bin16<br/>           f_Blastocelluloseae<br/>           f_Borkfalkiaceae<br/>           f_Brevibacillaceae<br/>           f_Brevibacteriaceae<br/>           f_Brucellaceae<br/>           f_Bryobacteraceae<br/>           f_Burkholderiaceae<br/>           f_Butyricoccaceae<br/>           f_CAG-58<br/>           f_CAG-74<br/>           f_Caldicellulosiruptoraceae<br/>           f_Calditerricolaceae<br/>           f_Caloramatoraceae<br/>           f_Campylobacteraceae<br/>           f_Cardiobacteriaceae<br/>           f_Caulobacteriaceae<br/>           f_Caulobacteraceae<br/>           f_Cellulomonadaceae</p> | <p>f_Cellvibrionaceae<br/>           f_Chitinomonadaceae<br/>           f_Chitinophagaceae<br/>           f_Chromobacteriaceae<br/>           f_Chroococcidiopsidaceae<br/>           f_Chthoniobacteriaceae<br/>           f_Clostridiaceae<br/>           f_Coleofasciculaceae<br/>           f_Coprobacillaceae<br/>           f_Coprothermobacteriaceae<br/>           f_Coriobacteriaceae<br/>           f_Crociniomacaceae<br/>           f_Cryptosporangiaceae<br/>           f_CSP1-4<br/>           f_Cyclobacteriaceae<br/>           f_Cytophagaceae<br/>           f_Deinococcaceae<br/>           f_Dermabacteraceae<br/>           f_Dermatophilaceae<br/>           f_Lacipirillulaceae<br/>           f_Desulfobulbaceae<br/>           f_Desulfomicrobiaceae<br/>           f_Devisiaceae<br/>           f_Leptotrichiaceae<br/>           f_Diploricetisiaceae<br/>           f_Domibacillaceae<br/>           f_DSM-1321<br/>           f_DSM-18226<br/>           f_DSM-22653<br/>           f_DSM-44946<br/>           f_DSM-45169<br/>           f_DTU12<br/>           f_DTU23<br/>           f_Dysgonomonadaceae<br/>           f_Eggerthellaceae<br/>           f_Elainellaceae<br/>           f_Elsteraceae<br/>           f_Enterobacteriaceae<br/>           f_Enterococcaceae<br/>           f_Erysioplotrichaceae<br/>           f_Ethanoligenenaceae<br/>           f_Eubacteriaceae<br/>           f_Fastidiosipilaceae<br/>           f_Ferrovibrionaceae<br/>           f_Filifactoraceae<br/>           f_Flavobacteriaceae<br/>           f_Francisellaceae<br/>           f_Fusobacteriaceae<br/>           f_Ga77536<br/>           f_Gallionellaceae<br/>           f_Gastranaerophilaceae<br/>           f_GBS-DC<br/>           f_Gemmataceae<br/>           f_Gemmatimonadaceae<br/>           f_Geodermatophilaceae<br/>           f_Granulosicoccaceae</p> | <p>f_Hallangiaceae<br/>           f_Halobacillaceae<br/>           f_Halococcaceae<br/>           f_Halomonadaceae<br/>           f_Haloplasmataceae<br/>           f_Helicobacteraceae<br/>           f_Hymenobacteraceae<br/>           f_Hyphomicrobiaceae<br/>           f_Hyphomonadaceae<br/>           f_Illumatobacteriaceae<br/>           f_Immundisolibacteraceae<br/>           f_JACDCH1<br/>           f_JC228<br/>           f_Jiangeliaceae<br/>           f_Kineococcaceae<br/>           f_Kineosporiaceae<br/>           f_Koribacteraceae<br/>           f_Kyripidiaceae<br/>           f_Lachnospiraceae<br/>           f_Lachnospiraceae<br/>           f_Lactobacillaceae<br/>           f_Lentimicrobiaceae<br/>           f_Lutisporaceae<br/>           f_Marinifilaceae<br/>           f_Marinococcaceae<br/>           f_Marinomonadaceae<br/>           f_Methanobacteriaceae<br/>           f_Methanobacteriaceae<br/>           f_Methylomonadaceae<br/>           f_Methylophilaceae<br/>           f_Methylophilaceae<br/>           f_Methylothermaceae<br/>           f_Micavibrionaceae<br/>           f_Microbacteriaceae<br/>           f_Micrococccaceae<br/>           f_Microcoleaceae<br/>           f_Microtrichaceae<br/>           f_Micromonosporaceae<br/>           f_Monoglobaceae<br/>           f_Moorellaceae<br/>           f_Moraxellaceae<br/>           f_Muribaculaceae<br/>           f_Myobacteriaceae<br/>           f_Myrococcaceae<br/>           f_Nakamurellaceae<br/>           f_Nanopelagiacaeae<br/>           f_Nanosyncoccaceae<br/>           f_NBRC-13111<br/>           f_Negativicoccaceae<br/>           f_Neisseriaceae<br/>           f_Nitrosomonadaceae<br/>           f_Nitrososphaeraceae<br/>           f_Nitrospiraceae</p> | <p>f_Nocardioideae<br/>           f_Nostocaceae<br/>           f_Obscuribacteraceae<br/>           f_Oleiphilaceae<br/>           f_Oligoflexaceae<br/>           f_Opitutaceae<br/>           f_Oscillospiraceae<br/>           f_P3<br/>           f_Paenibacillaceae<br/>           f_Pasteurellaceae<br/>           f_Pelagibacteraceae<br/>           f_Peptococcaceae<br/>           f_Peptoniophilaceae<br/>           f_Peptostreptococcaceae<br/>           f_Peredibacteraceae<br/>           f_Phormidemiaceae<br/>           f_Phreatobacteraceae<br/>           f_Pyrifidiaceae<br/>           f_Planococcaceae<br/>           f_Pleomorphomonadaceae<br/>           f_Porphryomonadaceae<br/>           f_Promineofilaceae<br/>           f_Propionibacteriaceae<br/>           f_Propionisporaceae<br/>           f_Pseudomonadaceae<br/>           f_Pseudomonadaceae<br/>           f_Pyrinomonadaceae<br/>           f_QAKW1<br/>           f_Quadrifisphaeraceae<br/>           f_Rhabdochlamydiaceae<br/>           f_Rhizobaceae<br/>           f_Rhodanobacteraceae<br/>           f_Rhodobacteraceae<br/>           f_Rhodocyclaceae<br/>           f_Rhodomicrobiaceae<br/>           f_Rickettsiaceae<br/>           f_Rikenellaceae<br/>           f_Rubrobacteraceae<br/>           f_Ruminococcaceae<br/>           f_Saliniococcaceae<br/>           f_Saprosiraceae<br/>           f_SbA1<br/>           f_Salenomonadaceae<br/>           f_SGS-39<br/>           f_SGS-41<br/>           f_Shewanellaceae<br/>           f_SMI A2<br/>           f_Solirubrobacteraceae<br/>           f_Sphingobacteriaceae<br/>           f_Sphingomonadaceae<br/>           f_Spirosomaceae<br/>           f_Sporanaerobacteraceae<br/>           f_Sporichthyaceae<br/>           f_Sporolactobacillaceae<br/>           f_Staphylococcaceae<br/>           f_Steroidobacteraceae</p> | <p>f_Streptococcaceae<br/>           f_Streptomycetaceae<br/>           f_Streptosporangiaceae<br/>           f_SZUA-229<br/>           f_Tannerellaceae<br/>           f_TH1-2<br/>           f_Thermaceae<br/>           f_Thermoactinomycetaceae<br/>           f_Thermoanaerobacteraceae<br/>           f_Thermodesulfobacteriaceae<br/>           f_Thermonemataceae<br/>           f_Thiobacillaceae<br/>           f_UBA11358<br/>           f_UBA11471<br/>           f_UBA118<br/>           f_UBA1547<br/>           f_UBA1924<br/>           f_UBA4765<br/>           f_UBA5272<br/>           f_UBA574<br/>           f_UBA66<br/>           f_UBA6776<br/>           f_UBA7656<br/>           f_UBA932<br/>           f_UBA9339<br/>           f_UBA9968<br/>           f_Usitathibacteraceae<br/>           f_UXAT2<br/>           f_VadinHA17<br/>           f_Vagococcaceae<br/>           f_Valitellaceae<br/>           f_Vellionellaceae<br/>           f_Verrucomicrobiaceae<br/>           f_Vibrionaceae<br/>           f_Vicinibacteriaceae<br/>           f_Vicingaceae<br/>           f_Weeksellaceae<br/>           f_Woeseiaceae<br/>           f_WYB11<br/>           f_Xanthobacteraceae<br/>           f_Xanthomonadaceae<br/>           f_Xanococcaceae<br/>           f_Xiphiematabacteraceae</p> | <p>Manual removal of<br/>           Decontam-noted taxa<br/>           Threshold 0.1<br/>           (n = 408)</p>                                                                                                                                                                                                                                                                                                                                                                                                                                                                                                                                                                                                                                                                                                                                                                                                                                                                                                                                              | <p>Manual Removal of<br/>           Commonly Identified<br/>           Contaminants<br/>           (n= 384)</p> |
| <p>g_Arthrobacter<br/>           g_Bacillus<br/>           g_Methylobacterium<br/>           g_Neisseria<br/>           s_Acidovorax soli<br/>           s_Alishewanella jeotgali<br/>           s_Anoxybacillus geothermaliis<br/>           s_Brachybacitrium sacelli<br/>           s_Geobacillus thermocatenulatus<br/>           s_Janibacter hoylei<br/>           s_Methylobacterium fujisawaense<br/>           s_Paraburkholderia bryophila<br/>           s_Pleomorphobacillus toebii<br/>           s_Pelomonas aquatica<br/>           s_Pelomonas puraquae<br/>           s_PMMR1 sp000733915<br/>           s_Prestia megaterium<br/>           s_Pseudomonas mucoides<br/>           s_Pseudomonas chengduensis<br/>           s_Rubrobacter naiaicus<br/>           s_Saccharococcus caldxylosilyticus<br/>           s_Saliniococcus alkaliphilus<br/>           s_Schlegelella aquatica<br/>           s_SIO2C1 sp10672925<br/>           s_Streptococcus mitis_AR_351037<br/>           s_Tepidiphilus succinatimandens<br/>           s_Thermus thermophilus</p>                                                                                                                                                                                                                                                                                                                                                                                                                                                                                                                                                                                                                                                                                                                                                                                        |                                                                                                                                                                                                                                                                                                                                                                                                                                                                                                                                                                                                                                                                                                                                                                                                                                                                                                                                                                                                                                                                                                                                                                                                                                                                                                                                                                                                                                                                                                                                                                                                                                                                                                                                                                                                                                                                                                        |                                                                                                                                                                                                                                                                                                                                                                                                                                                                                                                                                                                                                                                                                                                                                                                                                                                                                                                                                                                                                                                                                                                                                                                                                                                                                                                                                                                                                                                                                                                                                                                                                                                                                                                                                                                                                |                                                                                                                                                                                                                                                                                                                                                                                                                                                                                                                                                                                                                                                                                                                                                                                                                                                                                                                                                                                                                                                                                                                                                                                                                                                                                                                                                                                                                                                                                                                                                                                                                                                                                                                                                                                                                                                                                                           |                                                                                                                                                                                                                                                                                                                                                                                                                                                                                                                                                                                                                                                                                                                                                                                                                                                                                                                                                                                                                                                                                                                                                                                                                                                                                                                                   | <p>f_Coleofasciculaceae; g_SIO2C1;<br/>           s_sp10672925<br/>           f_Geodermatophilaceae; g_Blastococcus;<br/>           s_aggregatus<br/>           f_Geodermatophilaceae; g_Blastococcus;<br/>           s_Itoris<br/>           f_Geodermatophilaceae;<br/>           g_Geodermatophilus; s_marinus<br/>           f_Aquificaceae; g_Thermotrix;<br/>           s_azorensis<br/>           f_Deinococcaceae; g_Deinococcus;<br/>           s_geothermaliis<br/>           f_Thermaceae; g_Thermus ;<br/>           s_irciformis<br/>           f_Caldicellulosiruptoraceae;<br/>           g_Thermoanaerobacterium; s_acetigenus<br/>           f_Thermoanaerobacteraceae;<br/>           g_Thermoanaerobacterium;<br/>           s_butyrificiformans<br/>           f_Pseudomonadaceae; g_Pseudomonas;<br/>           s_salamoni<br/>           f_Thermaceae; g_Meiothermus; s_silvanus<br/>           o_Rhizobiales<br/>           f_Pseudomonadaceae; g_Pseudomonas;<br/>           s_furukawai<br/>           d.; p.; c.; o.; f.; g.; s.</p> |                                                                                                                 |
| <p>RETAINED:<br/>           s_Bifidobacterium vaginale<br/>           s_Kocuria palustris<br/>           s_Roseburia intestinalis<br/>           s_Streptococcus agalactiae<br/>           s_Staphylococcus microti</p>                                                                                                                                                                                                                                                                                                                                                                                                                                                                                                                                                                                                                                                                                                                                                                                                                                                                                                                                                                                                                                                                                                                                                                                                                                                                                                                                                                                                                                                                                                                                                                                                                                                     |                                                                                                                                                                                                                                                                                                                                                                                                                                                                                                                                                                                                                                                                                                                                                                                                                                                                                                                                                                                                                                                                                                                                                                                                                                                                                                                                                                                                                                                                                                                                                                                                                                                                                                                                                                                                                                                                                                        |                                                                                                                                                                                                                                                                                                                                                                                                                                                                                                                                                                                                                                                                                                                                                                                                                                                                                                                                                                                                                                                                                                                                                                                                                                                                                                                                                                                                                                                                                                                                                                                                                                                                                                                                                                                                                |                                                                                                                                                                                                                                                                                                                                                                                                                                                                                                                                                                                                                                                                                                                                                                                                                                                                                                                                                                                                                                                                                                                                                                                                                                                                                                                                                                                                                                                                                                                                                                                                                                                                                                                                                                                                                                                                                                           |                                                                                                                                                                                                                                                                                                                                                                                                                                                                                                                                                                                                                                                                                                                                                                                                                                                                                                                                                                                                                                                                                                                                                                                                                                                                                                                                   |                                                                                                                                                                                                                                                                                                                                                                                                                                                                                                                                                                                                                                                                                                                                                                                                                                                                                                                                                                                                                                                                |                                                                                                                 |
| <p>Final Feature Table</p>                                                                                                                                                                                                                                                                                                                                                                                                                                                                                                                                                                                                                                                                                                                                                                                                                                                                                                                                                                                                                                                                                                                                                                                                                                                                                                                                                                                                                                                                                                                                                                                                                                                                                                                                                                                                                                                  |                                                                                                                                                                                                                                                                                                                                                                                                                                                                                                                                                                                                                                                                                                                                                                                                                                                                                                                                                                                                                                                                                                                                                                                                                                                                                                                                                                                                                                                                                                                                                                                                                                                                                                                                                                                                                                                                                                        |                                                                                                                                                                                                                                                                                                                                                                                                                                                                                                                                                                                                                                                                                                                                                                                                                                                                                                                                                                                                                                                                                                                                                                                                                                                                                                                                                                                                                                                                                                                                                                                                                                                                                                                                                                                                                |                                                                                                                                                                                                                                                                                                                                                                                                                                                                                                                                                                                                                                                                                                                                                                                                                                                                                                                                                                                                                                                                                                                                                                                                                                                                                                                                                                                                                                                                                                                                                                                                                                                                                                                                                                                                                                                                                                           |                                                                                                                                                                                                                                                                                                                                                                                                                                                                                                                                                                                                                                                                                                                                                                                                                                                                                                                                                                                                                                                                                                                                                                                                                                                                                                                                   |                                                                                                                                                                                                                                                                                                                                                                                                                                                                                                                                                                                                                                                                                                                                                                                                                                                                                                                                                                                                                                                                |                                                                                                                 |

**Supplementary Figure 2. Flow chart of contaminant sequence removal to generate feature tables.** All studies were merged prior to taxonomic assignment. In the resulting feature table, OTUs that appeared in less than 5 samples were removed in Qiime2 followed by removal of contaminants using Decontam in R. The table was re-imported into Qiime2 for the manual removal of known contaminants.

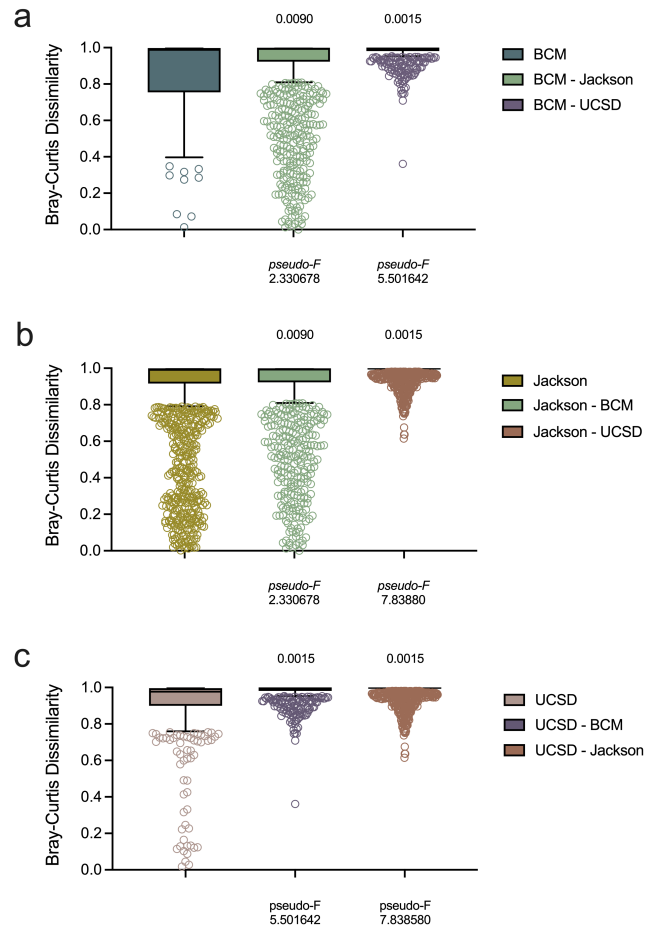

**Supplementary Figure 3. The microbial composition of the murine vaginal tract varies between vivaria.** Vaginal swabs from mouse colonies raised at BCM ( $n = 21$ ), Jackson Lab ( $n = 30$ ), and UCSD ( $n = 12$ , mice repeatedly swabbed) were collected and sequenced over the 16S rRNA V4 region. Colony instability and inter-site variation (Bray-Curtis dissimilarity) in comparison to **(a)** BCM, **(b)** Jackson Labs, and **(c)** UCSD. Tukey's boxplots are displayed (a-c). Data were analyzed by PERMANOVA followed by PERMDISP (a-c). PERMANOVA  $P$  values ( $P < 0.1$ ) are colored in red if PERMDISP was also statistically significant ( $P < 0.05$ ). Adjusted  $P$  values  $< 0.1$  are reported.

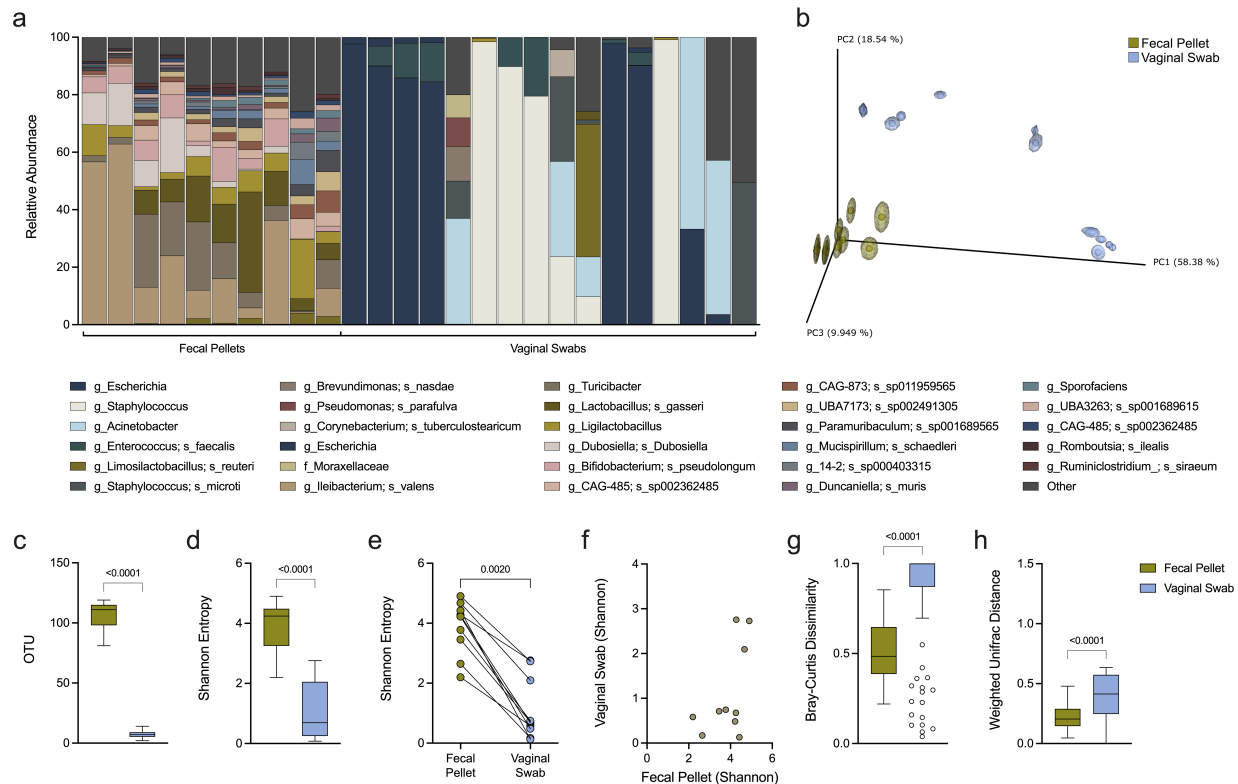

**Supplementary Figure 4.  $H^{Mb}$  mice have tissue-specific microbial compositions.** Vaginal swab and fecal pellet sets were collected from a cohort of  $H^{Mb}$  mice ( $n = 16$ ) **(a)** Microbial compositions of fecal pellets (left) and vaginal swabs (right) where the first ten vaginal communities are matched to fecal communities in corresponding order. **(b)** PCoA of vaginal and fecal communities clustered by weighted normalized UniFrac distances. Centroids were determined by jackknifed rarefaction (100 reads). **(c)** Observed OTUs, **(d)** Shannon entropy, and **(e)** pairwise Shannon entropy ( $n = 10$ ) between vaginal and fecal communities. **(f)** Correlation between Shannon entropy in vaginal and fecal samples within mice ( $n = 10$ ). **(g)** Bray-Curtis or **(h)** weighted UniFrac distances from both sample types. Tukey's boxplots (c-d, f-g) or individual samples or comparisons marked as columns (a) or symbols (b, e) are displayed. Data were statistically analyzed by Mann-Whitney (c-d, g-h) or Wilcoxon Rank Sum test (e), or Spearman Correlation (f). Statistically significant  $P$  values are reported.

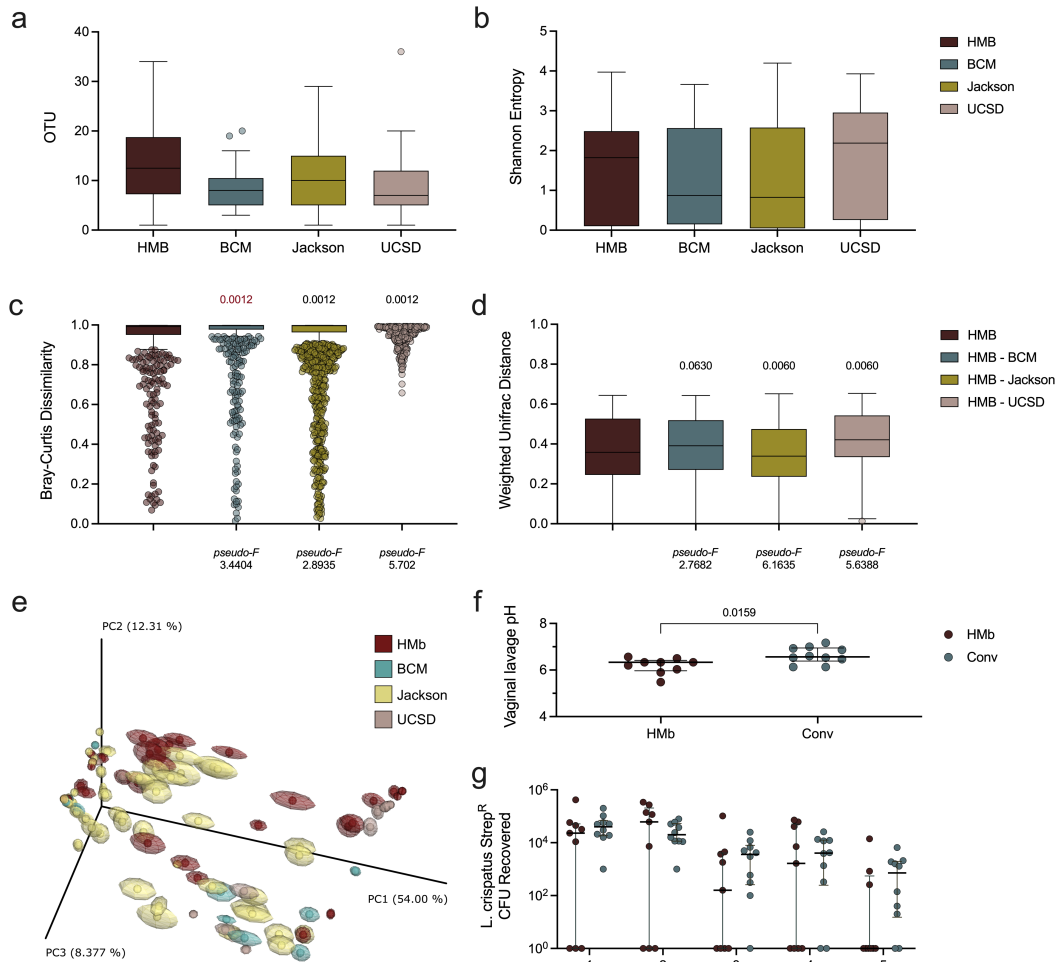

**Supplementary Figure 5.  $H_{Mb}$  mice display unique and variable vaginal microbiota compared to conventional mice.**  $H_{Mb}$  mice vaginal compositions were compared to the vaginal microbiota of the conventionally colonized mice from **Fig. 1**. **(a)** Observed OTUs and **(b)** Shannon entropy of vaginal swab samples.  $H_{Mb}$  colony instability and inter-colony variation by **(c)** Bray-Curtis and **(d)** weighted normalized UniFrac distances in comparison to BCM, Jackson Labs, and UCSD. **(e)** PCoA of vaginal communities clustered by weighted normalized UniFrac distances between colonies. Centroids were determined by jackknifed rarefaction (100 reads). **(f)** Vaginal pH of  $H_{Mb}$  mice and conventionally colonized BCM mice determined from vaginal lavage. **(g)** Duration and abundance of *Lactobacillus* colonization in  $H_{Mb}$  mice and conventionally colonized BCM mice. Experiments were performed as one independent replicate (f-g). Tukey's boxplots (a-d) and individual samples marked as symbols (e) or symbols with median and interquartile ranges (f-g) are displayed. Data were statistically analyzed with Kruskal-Wallis with Dunn's multiple comparisons test (a-b), by PERMANOVA followed by PERMDISP (c-d), or Mann-Whitney (f) with corrections for multiple comparisons using the two-stage linear step-up procedure of Benjamini, Krieger and Yekutieli and a false discovery rate ( $<0.05$ ) (g). PERMANOVA  $P$  values ( $P < 0.1$ ) are colored in red if PERMDISP was also statistically significant ( $P < 0.05$ ). Statistically significant  $P$  values are reported. Adjusted  $P$  values  $< 0.1$  are reported for c-d, g.

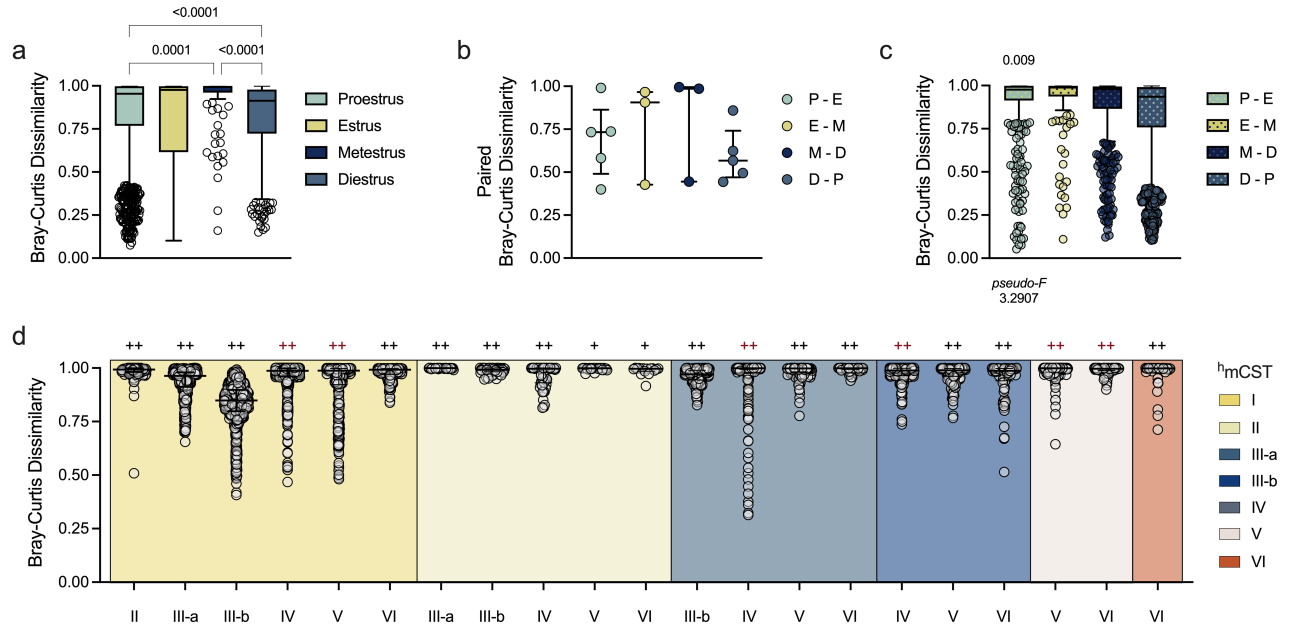

**Supplementary Figure 6. Vaginal microbiota dynamics across estrous stages and between <sup>h</sup>mCST in <sup>HMB</sup>mice.** Vaginal swabs were collected at baseline and assigned the host's estrous stage at time of collection. Bray-Curtis dissimilarity of microbial compositions **(a)** among samples categorized in the same estrous stage ( $n = 35$ ), **(b)** between paired, consecutive samples collected from individual mice, **(c)** between unpaired samples from sequential estrous stages, or **(d)** between <sup>h</sup>mCSTs ( $n = 183$  samples). <sup>h</sup>mCSTs labeled below are compared to the <sup>h</sup>mCST of the corresponding background color. **(d)** Tukey's boxplots (a,c) or individual comparisons marked as symbols with median and interquartile ranges (b,d) are displayed. Data were statistically analyzed by Kruskal-Wallis with Dunn's multiple comparisons test (a-b) or PERMANOVA followed by PERMDISP (c-d). PERMANOVA  $P$  values ( $P < 0.1$ ) are colored in red if PERMDISP was also statistically significant ( $P < 0.05$ ). All statistically significant  $P$  values are reported.  $^+P < 0.03$ ;  $^{++}P < 0.003$ .

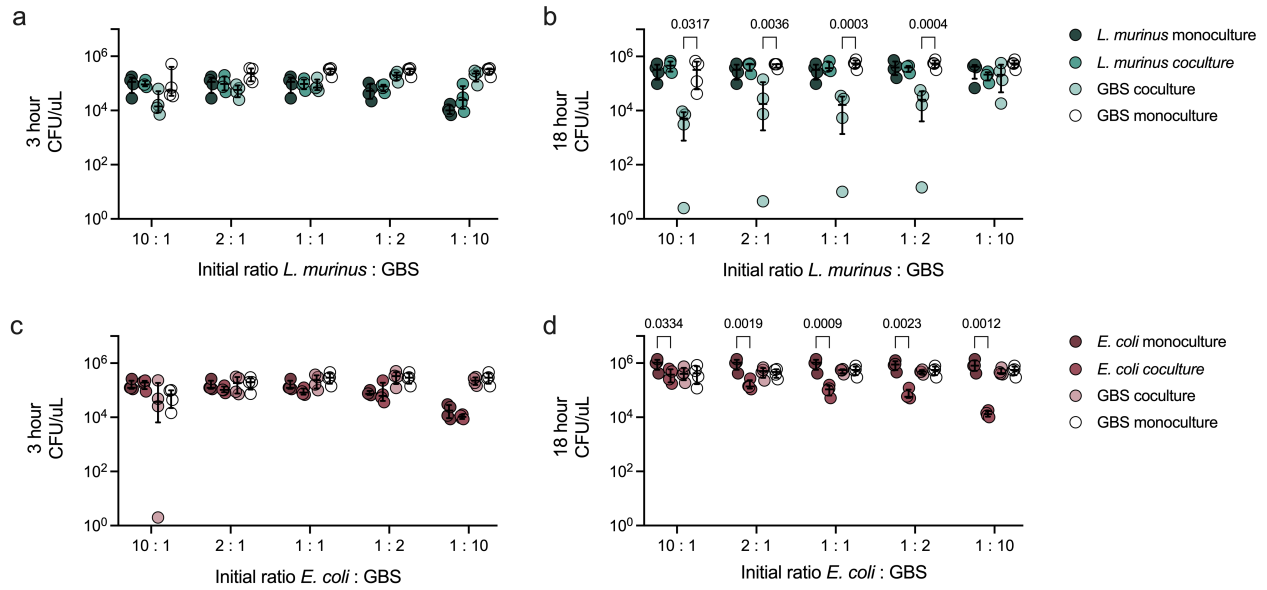

**Supplementary Figure 7. Viable CFU recovered from GBS competition experiments with *L. murinus* and *E. coli*.** GBS was cocultured with either (a, b) *L. murinus* or (c, d) *E. coli* at increasing concentrations of GBS. Viable CFU of all microbes in coculture as well as monoculture controls were quantified at (a, e) 3 hours and (b, d) 18 hours. Individual experimental replicates marked as symbols with median and interquartile ranges are displayed. Comparisons between monoculture and coculture were analyzed by 2-way ANOVA with Šídák's multiple comparison test; statistically significant *P* values are shown.



**Supplementary Table 1. *Ligilactobacillus* species candidates for <sup>HMb</sup>mice-associated OTUs cross-referenced through BLAST<sup>1</sup>**

| Taxonomy                            | OTU <sup>2</sup>                        | 16S v4 Region Sequence                                                                                                                                                          | BLAST result                                                                                                                                                                                         |  |
|-------------------------------------|-----------------------------------------|---------------------------------------------------------------------------------------------------------------------------------------------------------------------------------|------------------------------------------------------------------------------------------------------------------------------------------------------------------------------------------------------|--|
| g_ <i>Ligilactobacillus</i> ;<br>s_ | RS-GCF-910574405.1-NZ-CAJTAQ010000093.1 | TACGTAGGTGGCAAGCGTTATCC<br>GGATTTATTGGGCGTAAAGGGAA<br>CGCAGGCGGTCTTTTAAGTCTGAT<br>GTGAAAGCCTTCGGCTTAACCGG<br>AGTAGTGCATTGGAACTGGGAG<br>ACTTGAGTGCAGAAGAGGAGAGT<br>GGA ACTCCATG  | <i>Ligilactobacillus animalis</i><br><i>Ligilactobacillus murinus</i><br>Uncultured bacterium<br>(100% identity)                                                                                     |  |
|                                     | MJ005-barcode27-umi40855bins-ubs-6      | TACGTAGGTGGCAAGCGTTATCC<br>GGATTTATTGGGCGTAAAGGGAA<br>CGCAGGCGGTCTTTTAAGTCTGAT<br>GTGAAAGCCTTCGGCTTAACCGG<br>AGTAGTGCATTGGAACTGGGAG<br>GCTTGAGTGCAGAAGAGGAGAGT<br>GGA ACTCCATG  | Uncultured bacterium<br>(100% identity)<br><br>Uncultured Firmicutes<br><i>Ligilactobacillus animalis</i><br><i>Ligilactobacillus murinus</i><br><i>Ligilactobacillus faecis</i><br>(99.3% identity) |  |
|                                     |                                         |                                                                                                                                                                                 |                                                                                                                                                                                                      |  |
|                                     | MJ009-1-barcode35-umi86035bins-ubs-4    | TACGTAGGTGGCAAGCGTTATCC<br>GGATTTATTGGGCGTAAAGGGAA<br>CGCAGGCGGTCTTTTAATTCTGAT<br>GTGAAAGCCTTCGGCTTAACCGG<br>AGTAGTGCATTGGAACTGGGAG<br>ACTTGAGTGCAGAAGAGGAGAGT<br>GGA ACTCCATG  | <i>Ligilactobacillus animalis</i><br><i>Ligilactobacillus murinus</i><br><i>Ligilactobacillus faecis</i><br>Uncultured bacterium<br>(99.3% identity)                                                 |  |
|                                     | MJ009-2-barcode52-umi43642bins-ubs-14   | TACGTAGGTGGCAAGCGTTATCC<br>GGATTTATTGGGCGTAAAGAGAAC<br>GCAGGCGGTCTTTTAAGTCTGATG<br>TGAAAGCCTTCGGCTTAACCGGA<br>GTAGTGCATTGGAACTGGGAGA<br>CTTGAGTGCAGAAGAGGAGAGTG<br>GGA ACTCCATG | <i>Ligilactobacillus murinus</i><br>Uncultured bacterium<br>(100% identity)                                                                                                                          |  |
|                                     | RS-GCF-004793535.1-NZ-SRYK01000136.1    | TACGTAGGTGGCAAGCGTTATCC<br>GGATTTATTGGGCGTAAAGGGAA<br>CGCAGGCGGTCTTTTAAGTCTGAT<br>GTGAAAGCCTTCGGCTTACCGG<br>AGTAGTGCATTGGAACTGGGAG<br>ACTTGAGTGCAGAAGAGGAGAGT<br>GGA ACTCCATG   | Uncultured bacterium<br>(100% identity)<br><br><i>Ligilactobacillus animalis</i><br><i>Ligilactobacillus murinus</i><br>(99.3% identity)                                                             |  |

<sup>1</sup>Timestamp for BLAST search is Sep. 5, 2023 at 11:40:08.

<sup>2</sup>Top two bolded OTUs are the first and second most abundant OTUs shown in **Fig. 4a**. Other *Ligilactobacillus* OTUs in the study, but not displayed Fig. 4a, are noted below the grey bar.

**Supplementary Table 2. Statistics<sup>1</sup> on <sup>h</sup>mCST compositional comparisons**

| Group 1 | Group 2 | Sample size | Bray-Curtis |         |         |          |         |         | Weighted normalized UniFrac |         |         |          |         |         |
|---------|---------|-------------|-------------|---------|---------|----------|---------|---------|-----------------------------|---------|---------|----------|---------|---------|
|         |         |             | PERMANOVA   |         |         | PERMDISP |         |         | PERMANOVA                   |         |         | PERMDISP |         |         |
|         |         |             | pseudo-F    | p-value | q-value | F-value  | p-value | q-value | pseudo-F                    | p-value | q-value | F-value  | p-value | q-value |
| I       | II      | 50          | 12.433      | 0.001   | 0.001   | 0.908    | 0.522   | 0.693   | 14.459                      | 0.001   | 0.001   | 0.017    | 0.868   | 0.868   |
| I       | III-a   | 61          | 38.618      | 0.001   | 0.001   | 0.310    | 0.567   | 0.700   | 441.093                     | 0.001   | 0.001   | 5.428    | 0.019   | 0.033   |
| I       | III-b   | 64          | 28.330      | 0.001   | 0.001   | 4.103    | 0.051   | 0.153   | 187.833                     | 0.001   | 0.001   | 6.696    | 0.013   | 0.027   |
| I       | IV      | 68          | 22.759      | 0.001   | 0.001   | 106.351  | 0.001   | 0.005   | 28.772                      | 0.001   | 0.001   | 147.736  | 0.001   | 0.003   |
| I       | V       | 58          | 25.598      | 0.001   | 0.001   | 13.192   | 0.001   | 0.005   | 85.269                      | 0.001   | 0.001   | 3.993    | 0.050   | 0.081   |
| I       | VI      | 52          | 21.418      | 0.001   | 0.001   | 0.026    | 0.912   | 0.959   | 34.302                      | 0.001   | 0.001   | 0.155    | 0.703   | 0.738   |
| II      | III-a   | 17          | 6.906       | 0.001   | 0.001   | 0.107    | 0.641   | 0.748   | 331.763                     | 0.002   | 0.003   | 3.018    | 0.003   | 0.007   |
| II      | III-b   | 20          | 6.335       | 0.001   | 0.001   | 0.001    | 0.968   | 0.968   | 42.674                      | 0.003   | 0.004   | 0.944    | 0.386   | 0.450   |
| II      | IV      | 24          | 1.866       | 0.002   | 0.002   | 19.327   | 0.099   | 0.231   | 2.799                       | 0.017   | 0.018   | 18.220   | 0.003   | 0.007   |
| II      | V       | 14          | 4.439       | 0.004   | 0.004   | 0.347    | 0.528   | 0.693   | 42.290                      | 0.005   | 0.006   | 2.401    | 0.074   | 0.111   |
| II      | VI      | 8           | 5.299       | 0.024   | 0.024   | 0.216    | 0.459   | 0.689   | 14.915                      | 0.030   | 0.030   | 0.358    | 0.338   | 0.418   |
| III-a   | III-b   | 31          | 18.897      | 0.001   | 0.001   | 0.436    | 0.349   | 0.590   | 40.802                      | 0.001   | 0.001   | 20.529   | 0.001   | 0.003   |
| III-a   | IV      | 35          | 7.606       | 0.001   | 0.001   | 20.934   | 0.001   | 0.005   | 23.878                      | 0.001   | 0.001   | 114.700  | 0.001   | 0.003   |
| III-a   | V       | 25          | 13.372      | 0.001   | 0.001   | 1.666    | 0.091   | 0.231   | 1213.320                    | 0.001   | 0.001   | 0.271    | 0.443   | 0.490   |
| III-a   | VI      | 19          | 11.841      | 0.001   | 0.001   | 0.010    | 0.913   | 0.959   | 529.781                     | 0.001   | 0.001   | 1.181    | 0.247   | 0.341   |
| III-b   | IV      | 38          | 8.454       | 0.001   | 0.001   | 29.356   | 0.001   | 0.005   | 12.470                      | 0.001   | 0.001   | 59.232   | 0.001   | 0.003   |
| III-b   | V       | 28          | 13.076      | 0.001   | 0.001   | 0.944    | 0.272   | 0.519   | 174.170                     | 0.001   | 0.001   | 11.502   | 0.001   | 0.003   |
| III-b   | VI      | 22          | 9.870       | 0.002   | 0.002   | 0.671    | 0.365   | 0.590   | 73.378                      | 0.001   | 0.001   | 4.886    | 0.019   | 0.033   |
| IV      | V       | 32          | 5.409       | 0.001   | 0.001   | 16.328   | 0.002   | 0.008   | 11.582                      | 0.001   | 0.001   | 90.609   | 0.001   | 0.003   |
| IV      | VI      | 26          | 4.015       | 0.001   | 0.001   | 35.181   | 0.007   | 0.025   | 4.942                       | 0.003   | 0.004   | 33.970   | 0.001   | 0.003   |
| V       | VI      | 16          | 7.454       | 0.001   | 0.001   | 2.036    | 0.138   | 0.290   | 61.996                      | 0.001   | 0.001   | 1.054    | 0.260   | 0.341   |

<sup>1</sup>Pair-wise PERMANOVA and PERMDISP were performed with 999 permutations using Qiime2 package “qiime diversity beta-group-significance”.
